# Supplementary material for: Transcriptomics and methylomics of CD4-positive T cells in arsenic-exposed women
Source: PubMed Central journal article supplement (PMC5399044; doi:10.1007/s00204-016-1879-4), 2016-11-12
Supplement: 204_2016_1879_MOESM1_ESM.pdf [file 204_2016_1879_MOESM1_ESM.pdf]

**Supplemental material for:**

**Transcriptomics and Methyloomics of CD4-Positive T Cells in  
Arsenic-Exposed Women**

Karin Engström<sup>1,2\*</sup>, Tomasz K Wojdacz<sup>2\*</sup> Francesco Marabita<sup>3,4</sup>, Philip Ewels<sup>5</sup>, Max Käller<sup>6</sup>, Francesco Vezzi<sup>5</sup>, Nicola Prezza<sup>6</sup>, Joel Gruselius<sup>7</sup>, Marie Vahter<sup>1</sup>, Karin Broberg<sup>2</sup>

<sup>1</sup>Department of Laboratory Medicine, Division of Occupational and Environmental Medicine, Lund University, 221 85 Lund, Sweden

<sup>2</sup>Unit of Metals and Health, Institute of Environmental Medicine, Karolinska Institutet, 171 77 Stockholm, Sweden

<sup>3</sup>Unit of Computational Medicine, Center for Molecular Medicine, Karolinska University Hospital L805, 171 76 Stockholm, Sweden

<sup>4</sup>Bioinformatics Infrastructure for Life Sciences, Karolinska Institutet, 171 65 Solna, Sweden

<sup>5</sup>Science for Life Laboratory (SciLifeLab), Department of Biochemistry and Biophysics, Stockholm University, 106 91 Stockholm, Sweden

<sup>6</sup>Science for Life Laboratory, School of Biotechnology, Division of Gene Technology, Royal Institute of Technology, 171 65 Solna, Sweden

<sup>7</sup>Department of Mathematical and Computer Science, University of Udine, 331 00 Udine, Italy

\* These authors contributed equally to the work and are listed in alphabetic order.

## **Table of contents**

Table S1. Characteristics of the women in the study.

Table S2. Top ten differentially expressed genes (DEGs) (based on p-value) between arsenic exposure groups.

Table S3. List of the top 10 gene ontologies related to arsenic exposure.

Table S4. The top 10 differentially methylated regions (DMRs) comparing lower (reference) and high arsenic exposure groups.

Table S5. Top 10 genes with both differently methylated and differently expressed genes related to arsenic exposure.

Figure S1. Cumulative distribution plots of each of the technical replicates tested for methylomics analysis.

Figure S2. Differences in DNA methylation of specific genomic regions between arsenic exposure groups.

Figure S3. Single CpG resolution of differences in DNA methylation between arsenic exposure groups from two genes that were significantly associated with both DNA methylation and gene expression.

**Table S1. Characteristics of the women in the study<sup>a</sup>**

| Variable                                  | Exposure group | Transcriptomics<br>(median, range) | Methylomics<br>(median, range) | P-value <sup>b</sup> |
|-------------------------------------------|----------------|------------------------------------|--------------------------------|----------------------|
| Age                                       | All            | 32 (27-52)                         | 39 (22-56)                     | 0.53                 |
|                                           | Lower exposed  | 44 (27-52)                         | 51 (22-56)                     |                      |
|                                           | High exposed   | 30.5 (28-33)                       | 35 (24-42)                     |                      |
| p-value <sup>c</sup>                      |                | 0.34                               | 0.34                           |                      |
| BMI (kg/m <sup>2</sup> )                  | All            | 27 (24-35)                         | 27 (21-30)                     | 0.53                 |
|                                           | Lower exposed  | 28 (24-35)                         | 27 (22-30)                     |                      |
|                                           | High exposed   | 26 (25-30)                         | 26 (21-29)                     |                      |
| p-value <sup>c</sup>                      |                | 0.69                               | 0.48                           |                      |
| Coca (percent users)                      | All            | 62.5%                              | 100%                           | 0.20                 |
|                                           | Lower exposed  | 50%                                | 100%                           |                      |
|                                           | High exposed   | 75%                                | 100%                           |                      |
| p-value <sup>c</sup>                      |                | 1.0                                | 1.0                            |                      |
| Total urinary arsenic (µg/L) <sup>d</sup> | All            | 135 (48-604)                       | 160 (48-604)                   | 0.96                 |
|                                           | Lower exposed  | 65 (48-77)                         | 59 (48-69)                     |                      |
|                                           | High exposed   | 276 (193-604)                      | 301 (252-604)                  |                      |
| p-value <sup>c</sup>                      |                | 0.029                              | 0.029                          |                      |

<sup>a</sup> N=8 for the “All” groups, N=4 for each of the low and high exposure groups, respectively. The overlap between the groups analysed for transcriptomics and methylation is three individuals.

<sup>b</sup> P-value for the difference between the individuals included in transcriptomics and methylomics analyses (Mann-Whitney test was employed for age, BMI and total urinary arsenic, while Fishers exact test was employed for coca)

<sup>c</sup> P-value for the difference between the high and low exposure group (Mann-Whitney test was employed for for age, BMI and total urinary arsenic, while Fishers exact test was employed for coca)

<sup>d</sup> Calculated as the sum of arsenic metabolites (inorganic arsenic, methylarsonic acid, and dimethylarsinic acid) adjusted to the average specific gravity of 1.020 g/mL .

**Table S2. Top ten differentially expressed genes (DEGs) (based on p-value) between arsenic exposure groups.**

| <b>Gene</b>     | <b>Gene description</b>                                                     | <b>Log<sub>2</sub>FC</b> | <b>q</b>               |
|-----------------|-----------------------------------------------------------------------------|--------------------------|------------------------|
| <i>TNFAIP3</i>  | tumor necrosis factor, alpha-induced protein 3                              | -3.73                    | 1.6*10 <sup>-101</sup> |
| <i>CD69</i>     | CD69 molecule                                                               | -3.59                    | 2.1*10 <sup>-77</sup>  |
| <i>TP53INP2</i> | tumor protein p53 inducible nuclear protein 2                               | -3.91                    | 7.2*10 <sup>-62</sup>  |
| <i>SBDS</i>     | SBDS ribosome assembly guanine nucleotide exchange factor                   | -2.79                    | 9.5*10 <sup>-52</sup>  |
| <i>NINJI</i>    | ninjurin 1                                                                  | -2.72                    | 2*10 <sup>-51</sup>    |
| <i>WHAMM</i>    | WAS protein homolog associated with actin, golgi membranes and microtubules | -2.82                    | 4.3*10 <sup>-50</sup>  |
| <i>DDIT3</i>    | DNA-damage-inducible transcript 3                                           | -3.03                    | 1.5*10 <sup>-43</sup>  |
| <i>GRASP</i>    | GRP1 (general receptor for phosphoinositides 1)-associated scaffold protein | -3.56                    | 5.1*10 <sup>-42</sup>  |
| <i>MIDN</i>     | midnolin                                                                    | -2.30                    | 1.8*10 <sup>-41</sup>  |
| <i>DUSP8</i>    | dual specificity phosphatase 8                                              | -4.44                    | 2.1*10 <sup>-41</sup>  |

q= FDR-adjusted p-value, Log<sub>2</sub>FC = log-2 fold change.

**Table S3. List of the top ten gene ontologies related to arsenic exposure.**

| <i>All DEGs</i>                                                                                 |                                                                     |                                     |                          |                                   |                       |
|-------------------------------------------------------------------------------------------------|---------------------------------------------------------------------|-------------------------------------|--------------------------|-----------------------------------|-----------------------|
| <b>GO ID</b>                                                                                    | <b>Term</b>                                                         | <b>No. of annotated genes in GO</b> | <b>No. of DEGs in GO</b> | <b>No. of expected DEGs in GO</b> | <b>P value</b>        |
| GO:0006414                                                                                      | translational elongation                                            | 194                                 | 114                      | 66                                | 1.7*10 <sup>-20</sup> |
| GO:0019083                                                                                      | viral transcription                                                 | 179                                 | 110                      | 61                                | 4.0*10 <sup>-19</sup> |
| GO:0006614                                                                                      | SRP-dependent cotranslational protein targeting to membrane         | 105                                 | 79                       | 36                                | 5.0*10 <sup>-18</sup> |
| GO:0006415                                                                                      | translational termination                                           | 170                                 | 100                      | 58                                | 5.3*10 <sup>-18</sup> |
| GO:0000184                                                                                      | nuclear-transcribed mRNA catabolic process, nonsense-mediated decay | 114                                 | 82                       | 39                                | 1.1*10 <sup>-16</sup> |
| GO:0006355                                                                                      | regulation of transcription, DNA-templated                          | 2535                                | 1032                     | 862                               | 1.7*10 <sup>-15</sup> |
| GO:0006413                                                                                      | translational initiation                                            | 250                                 | 138                      | 85                                | 1.1*10 <sup>-14</sup> |
| GO:0006357                                                                                      | regulation of transcription from RNA polymerase II promoter         | 1191                                | 460                      | 405                               | 6.2*10 <sup>-05</sup> |
| GO:0051276                                                                                      | chromosome organization                                             | 823                                 | 301                      | 280                               | 0.0003                |
| GO:0006364                                                                                      | rRNA processing                                                     | 136                                 | 76                       | 46                                | 0.0003                |
| <i>Upregulated DEGs (in high arsenic exposure group compared to low arsenic exposure group)</i> |                                                                     |                                     |                          |                                   |                       |
| GO:0006355                                                                                      | regulation of transcription, DNA-templated                          | 2535                                | 546                      | 485                               | 5.1*10 <sup>-17</sup> |
| GO:0010827                                                                                      | regulation of glucose transport                                     | 74                                  | 22                       | 14                                | 8.3*10 <sup>-05</sup> |
| GO:0008033                                                                                      | tRNA processing                                                     | 96                                  | 38                       | 18                                | 8.5*10 <sup>-05</sup> |
| GO:0030488                                                                                      | tRNA methylation                                                    | 15                                  | 9                        | 3                                 | 0.0006                |
| GO:0006606                                                                                      | protein import into nucleus                                         | 195                                 | 40                       | 37                                | 0.0007                |
| GO:0015031                                                                                      | protein transport                                                   | 1408                                | 280                      | 269                               | 0.0008                |
| GO:0006418                                                                                      | tRNA aminoacylation for protein translation                         | 46                                  | 20                       | 9                                 | 0.0008                |
| GO:0007077                                                                                      | mitotic nuclear envelope disassembly                                | 42                                  | 17                       | 8                                 | 0.001                 |
| GO:0006189                                                                                      | 'de novo' IMP biosynthetic process                                  | 6                                   | 5                        | 1                                 | 0.001                 |

|                                                                                                          |                                                                        |     |     |     |                  |
|----------------------------------------------------------------------------------------------------------|------------------------------------------------------------------------|-----|-----|-----|------------------|
| GO:0051028                                                                                               | mRNA transport                                                         | 118 | 34  | 23  | 0.001            |
| <b><i>Downregulated DEGs (in high arsenic exposure group compared to low arsenic exposure group)</i></b> |                                                                        |     |     |     |                  |
| GO:0006414                                                                                               | translational elongation                                               | 194 | 87  | 29  | $< 1 * 10^{-30}$ |
| GO:0006415                                                                                               | translational termination                                              | 170 | 78  | 25  | $< 1 * 10^{-30}$ |
| GO:0006614                                                                                               | SRP-dependent cotranslational protein targeting to membrane            | 105 | 74  | 16  | $< 1 * 10^{-30}$ |
| GO:0006413                                                                                               | translational initiation                                               | 250 | 103 | 37  | $< 1 * 10^{-30}$ |
| GO:0000184                                                                                               | nuclear-transcribed mRNA catabolic process, nonsense-mediated decay    | 114 | 74  | 17  | $< 1 * 10^{-30}$ |
| GO:0019083                                                                                               | viral transcription                                                    | 179 | 84  | 27  | $1.8 * 10^{-29}$ |
| GO:0000122                                                                                               | negative regulation of transcription from RNA polymerase II promoter   | 503 | 122 | 75  | $2.2 * 10^{-07}$ |
| GO:0045893                                                                                               | positive regulation of transcription, DNA-templated                    | 887 | 205 | 132 | $6.9 * 10^{-06}$ |
| GO:0034097                                                                                               | response to cytokine                                                   | 523 | 105 | 78  | $2.7 * 10^{-05}$ |
| GO:1900102                                                                                               | negative regulation of endoplasmic reticulum unfolded protein response | 9   | 7   | 1   | $4.3 * 10^{-05}$ |

**Table S4. The top 10 differentially methylated regions (DMRs) comparing lower (reference) and high arsenic exposure groups.**

| <b>Gene</b>      | <b>Gene description</b>                       | <b>Direction<sup>a</sup></b> | <b>Area of DMR</b> | <b>Nr of CpGs in DMR</b> |
|------------------|-----------------------------------------------|------------------------------|--------------------|--------------------------|
| <i>MIR5087</i>   | microRNA 5087                                 | -                            | 3.27               | 19                       |
| <i>C19orf35</i>  | chromosome 19 open reading frame 35           | -                            | 3.03               | 19                       |
| <i>FAM168B</i>   | family with sequence similarity 168, member B | -                            | 2.91               | 15                       |
| <i>SCGB3A1</i>   | secretoglobin, family 3A, member 1            | -                            | 2.72               | 16                       |
| <i>CLEC3B</i>    | C-type lectin domain family 3, member B       | -                            | 2.66               | 15                       |
| <i>LINC00837</i> | long intergenic non-protein coding RNA 837    | -                            | 2.36               | 15                       |
| <i>TMEM72</i>    | transmembrane protein 72                      | -                            | 2.34               | 12                       |
| <i>LOC728323</i> | hypothetical LOC728323                        | +                            | 2.30               | 14                       |
| <i>PVT1</i>      | Pvt1 oncogene (non-protein coding)            | -                            | 2.19               | 14                       |
| <i>MIR106A</i>   | microRNA 106a                                 | +                            | 2.17               | 14                       |

<sup>a</sup> Direction of association with arsenic group (low vs higher arsenic), using low exposure group as a reference.



**Table S5. Top 10 genes with both differently methylated and differently expressed genes related to arsenic exposure.**

| Gene             | Gene description                                      | Chromosome | DMR                    |             | DEG                 |                       |
|------------------|-------------------------------------------------------|------------|------------------------|-------------|---------------------|-----------------------|
|                  |                                                       |            | Direction <sup>a</sup> | Area of DMR | Log <sub>2</sub> FC | q                     |
| <i>ZNF200</i>    | zinc finger protein 200                               | 16         | +                      | 0.59        | 2.46                | 3.5*10 <sup>-18</sup> |
| <i>PVT1</i>      | Pvt1 oncogene (non-protein coding)                    | 8          | -                      | 2.19        | -1.24               | 2.9*10 <sup>-08</sup> |
| <i>SNX1</i>      | sorting nexin 1                                       | 15         | -                      | 0.70        | 1.38                | 3.6*10 <sup>-08</sup> |
| <i>CYP2U1</i>    | cytochrome P450, family 2, subfamily U, polypeptide 1 | 4          | -                      | 0.51        | 1.54                | 2.2*10 <sup>-07</sup> |
| <i>IRF1</i>      | interferon regulatory factor 1                        | 5          | +                      | 2.02        | -1.83               | 2.5*10 <sup>-07</sup> |
| <i>C1GALT1C1</i> | C1GALT1-specific chaperone 1                          | X          | -                      | 0.83        | 1.40                | 3.4*10 <sup>-07</sup> |
| <i>ZNF696</i>    | zinc finger protein 696                               | 8          | -                      | 0.65        | 2.84                | 3.6*10 <sup>-07</sup> |
| <i>FAM43A</i>    | family with sequence similarity 43, member A          | 3          | +                      | 0.46        | 1.92                | 1.3*10 <sup>-06</sup> |
| <i>FAM50B</i>    | family with sequence similarity 50, member B          | 6          | -                      | 1.21        | 2.03                | 1.9*10 <sup>-06</sup> |
| <i>RHOH</i>      | ras homolog family member H                           | 4          | -                      | 0.68        | -1.40               | 0.00002               |

DEG = differently expressed genes, DMR = differentially methylated regions, q= FDR-adjusted p-value, Log<sub>2</sub>FC = log-2 fold change

<sup>a</sup> Denotes the direction of the DMR analyses in relation to increasing arsenic exposure.

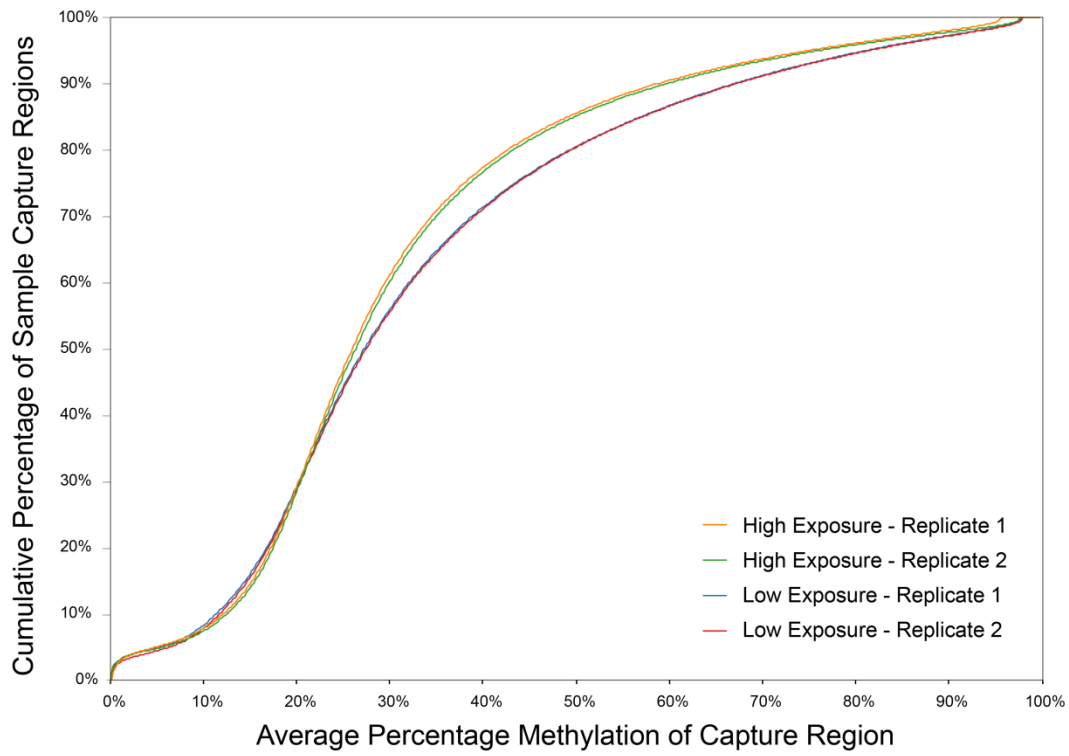

**Figure S1. Cumulative distribution plots of each of the technical replicates tested for the methylomics analysis.**

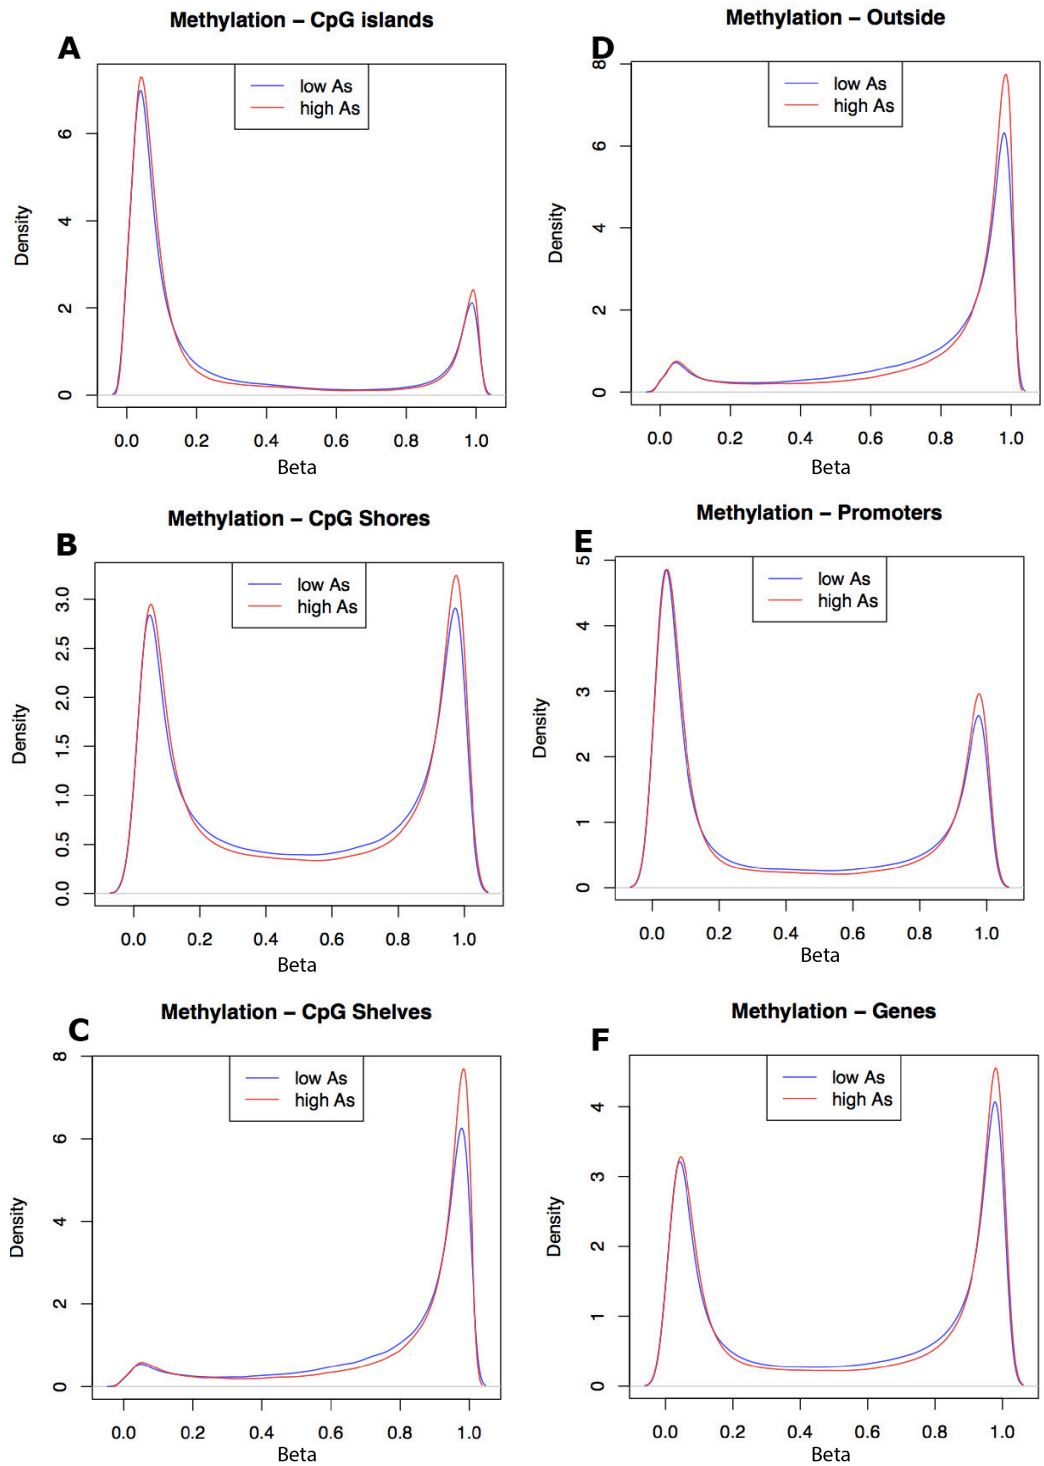

**Figure S2. Differences in DNA methylation of specific genomic regions between arsenic exposure groups.** Density plots describe mean methylation levels (beta-value) on the x-axis for specific genomic regions (indicated at the top of the figure) for lower (blue) and high (red) exposure groups (“outside” – refers to CpGs outside of CpG islands).

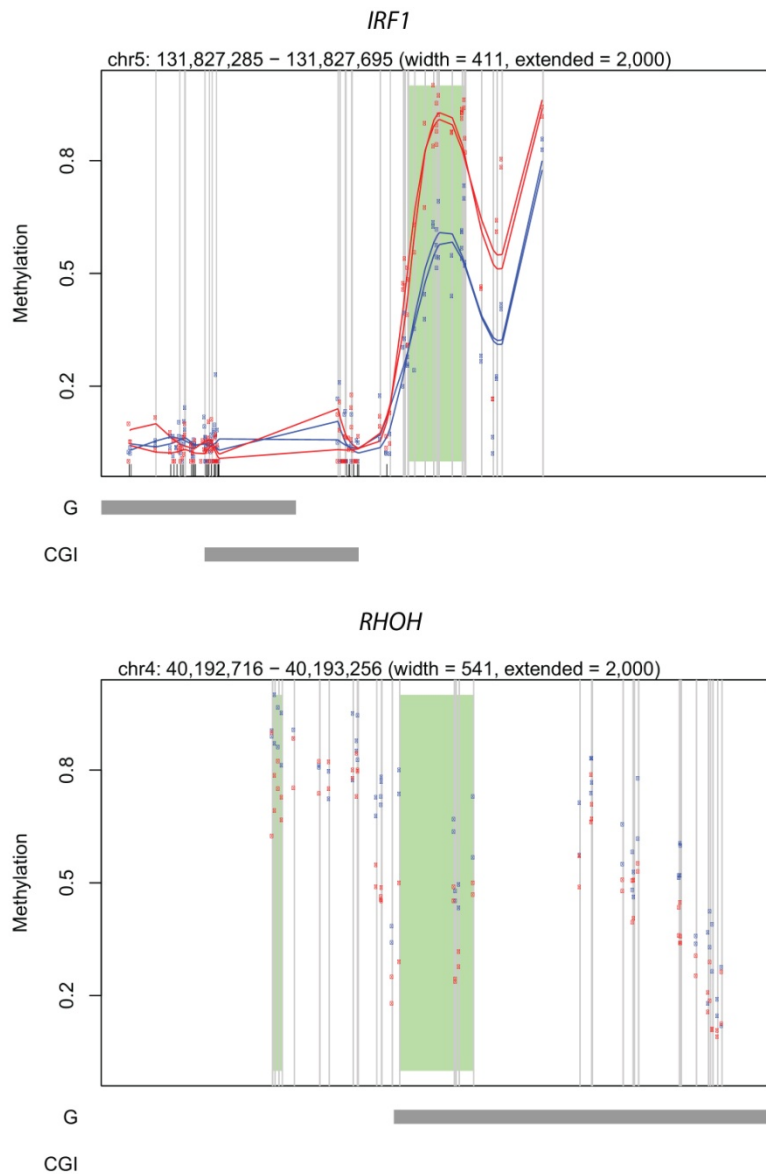

**Figure S3. Single CpG resolution of differences in DNA methylation between arsenic exposure groups from two genes that were significantly associated with both DNA methylation and gene expression.** The chromosome number and genomic position is shown above the figure. Exposure groups are shown in blue (lower exposure) and red (high exposure), vertical bars represent CpGs covered by targeted sequencing in specific regions. The methylation on the y-axis is shown as beta-values. Green boxes are regions of the genome where DMRs (defined here as four consecutive CpG sites with a difference in

methylation above 10% between high- and low-arsenic groups) were identified. Bottom bars indicate distances of the DMR to the closest gene (G) and CpG island (CGI).
